# Supplementary material
Source: publisher site journal article supplement (https://www.dovepress.com/article/308196)
Supplement: Supplementary file 1 [file get_supplementary_file.php]

| *eTable 1*  **Model Selection Using BIC and Predicted Group Proportions Using Group-Based Trajectory Models in Determining Days Covered Trajectory Groups (N = 438,398)** | | | | | | | | | | |
| --- | --- | --- | --- | --- | --- | --- | --- | --- | --- | --- |
| Predicted Group Proportions | | | | | | | | | | |
| *Number of Groups* | *BICa* | *Group1* | *Group2* | *Group3* | *Group4* | *Group5* | *Group6* | *Group7* | *Group8* | *Group9* |
| 2 | -7309811 | 50.00% | 50.00% |  |  |  |  |  |  |  |
| 3 | -6980186 | 41.32% | 24.10% | 34.58% |  |  |  |  |  |  |
| 4 | -6960086 | 9.48% | 23.64% | 29.67% | 37.21% |  |  |  |  |  |
| 5 | -6914819 | 21.52% | 9.20% | 9.18% | 23.56% | 36.53% |  |  |  |  |
| 6 | -6895379 | 5.36% | 10.64% | 8.45% | 18.59% | 21.92% | 35.04% |  |  |  |
| 7 | -6890440 | 4.44% | 6.53% | 8.29% | 5.81% | 18.64% | 21.54% | 34.74% |  |  |
| 8 | -6865565 | 15.05% | 6.26% | 3.90% | 4.72% | 5.90% | 15.07% | 18.11% | 31.01% |  |
| 9 | -6860529 | 15.35% | 3.51% | 5.59% | 5.97% | 6.66% | 10.98% | 4.06% | 17.51% | 30.38% |

*a*BIC=Bayesian Information Criterion. Higher values indicate better model fit.

| *eTable 2*  **Nagin’s Diagnostic Criteria for Days Covered Trajectories** | | | | | |
| --- | --- | --- | --- | --- | --- |
| *Group* | *Group Probability (95% Confidence Interval)a* | *Proportion Classified in Each Groupb* | *Average Posterior Probabilityc* | *Odds Correct Classificationd* | *|∆|e* |
| Slow, Persistent Days Covered Reduction | 0.166 (0.165, 0.167) | 0.154 | 0.702 | 11.87 | 0.012 |
| Days Covered Reduction Followed by Increase | 0.024 (0.023, 0.024) | 0.035 | 0.765 | 133.75 | 0.011 |
| Rapid Days Covered Reduction | 0.041 (0.041, 0.042) | 0.056 | 0.735 | 64.72 | 0.015 |
| Delayed Days Covered Reduction | 0.046 (0.046, 0.048) | 0.060 | 0.839 | 108.18 | 0.014 |
| Rapid Discontinuation | 0.065 (0.065, 0.066) | 0.067 | 0.879 | 103.67 | 0.001 |
| Moderate Paced Discontinuation | 0.109 (0.108, 0.110) | 0.110 | 0.750 | 24.49 | 0.001 |
| Delayed Discontinuation | 0.034 (0.033, 0.034) | 0.041 | 0.836 | 145.71 | 0.007 |
| Persistent, Moderate Days Covered | 0.177 (0.176, 0.179) | 0.175 | 0.734 | 12.80 | 0.002 |
| Persistent, High Days Covered | 0.337 (0.336, 0.339) | 0.304 | 0.844 | 10.66 | 0.034 |

a Actual proportion of individuals assigned to each trajectory group using the maximum probability rule.

b Proportion classified in each group is based on the maximum posterior probability rule.

c Average posterior probability is obtained by averaging the posterior probabilities for a given group for all individuals placed in this group by the maximum posterior probability rule. Average posterior probability is acceptable if equal to 0.7 or greater for each group.

d Odds Correct Classification values should be 5.0 or greater for each group.

e This value represents the difference between the group probability and the proportion classified in each group.

| *eTable 3*  Veteran Demographics by Opioid Trajectory | | | | | | | | | | | |
| --- | --- | --- | --- | --- | --- | --- | --- | --- | --- | --- | --- |
|  |  | *Persistent Opioid Therapy* | | *Reduced Opioid Therapy* | | | | *Discontinued Opioid Therapy* | | |  |
|  | Total Sample | Persistent, High Days Covered | Persistent, Moderate Days Covered | Slow, Persistent Days Covered Reduction | Days Covered Reduction Followed by Increase | Delayed Days Covered Reduction | Rapid Days Covered Reduction | Moderate Paced Discontinuation | Delayed Discontinuation | Rapid Discontinuation | P Valuea |
|  | *438,398* | *147,930 (33.7%)* | *77,753 (17.7%)* | *72,720 (16.6%)* | *10,370 (2.4%)* | *20,222 (4.6%)* | *18,010 (4.1%)* | *47,887 (10.9%)* | *14,833*  *(3.4%)* | *28,673*  *(6.5%)* |  |
| Race, (n, %) |  |  |  |  |  |  |  |  |  |  | <.0001 |
| White | 302,159  (68.92) | 108,179  (73.13) | 53,635  (68.98) | 46,536  (63.99) | 6,866  (66.21) | 14,194  (70.19) | 11,229  (62.35) | 31,489  (65.76) | 10,404  (70.14) | 19,627  (68.45) |  |
| Black | 75,415 (17.20) | 21,619 (14.61) | 13,375 (17.20) | 1,4668 (20.17) | 1,990 (19.19) | 3,413 (16.88) | 3,920 (21.77) | 9,189  (19.19) | 2,479  (16.71) | 4,762  (16.61) |  |
| Multiracial | 13,403 (3.06) | 4,071  (2.75) | 2,432  (3.13) | 2,430 (3.34) | 335  (3.23) | 636  (3.15) | 634  (3.52) | 1,570  (3.28) | 456  (3.07) | 839  (2.93) |  |
| Other | 30,604 (6.98) | 8,222  (5.56) | 5,298  (6.81) | 6,233 (8.57) | 811  (7.82) | 1,303  (6.44) | 1,606  (8.92) | 3,877  (8.10) | 959  (6.47) | 2,295  (8.00) |  |
| Unknown | 16,817 (3.84) | 5,839  (3.95) | 3,013  (3.88) | 2,853 (3.92) | 368  (3.55) | 676  (3.34) | 621  (3.45) | 1,762  (3.68) | 535  (3.61) | 1,150  (4.01) |  |
| Age, (mean, SD) |  |  |  |  |  |  |  |  |  |  |  |
|  | 57.27 (14.36) | 56.02 (13.60) | 58.94  (13.95) | 58.84 (14.53) | 56.73 (14.27) | 55.72 (14.53) | 56.68 (14.69) | 57.17  (15.19) | 55.93  (15.02) | 57.73  (15.82) | <.0001 |
| Age Categories, (n, %) |  |  |  |  |  |  |  |  |  |  | <.0001 |
| 18-30 | 24,192 (5.52) | 8,070  (5.46) | 3,085  (3.97) | 3,374 (4.64) | 613  (5.91) | 1,463  (7.23) | 1,161  (6.45) | 3,255  (6.80) | 1,120  (7.55) | 2,051  (7.15) |  |
| 31-40 | 35,467 (8.09) | 12,591 (8.51) | 5,284  (6.80) | 5,331 (7.33) | 854  (8.24) | 1,803  (8.92) | 1,555  (8.63) | 4,121  (8.61) | 1,381  (9.31) | 2,547  (8.88) |  |
| 41-50 | 62,445 (14.24) | 22,703 (15.35) | 10,188 (13.10) | 9,673 (13.30) | 1,553 (14.98) | 3,035 (15.01) | 2,673 (14.84) | 6,695  (13.98) | 2,146  (14.47) | 3,779  (13.18) |  |
| 51-60 | 120,686 (27.53) | 46,348 (31.33) | 20,478 (26.34) | 18,033 (24.80) | 2,886 (27.83) | 5,807 (28.72) | 4,653 (25.84) | 11,892  (24.83) | 4,065  (27.41) | 6,524  (22.75) |  |
| 61-70 | 130,790 (29.83) | 41,820 (28.27) | 25,410 (32.68) | 23,083 (31.74) | 3,008 (29.01) | 5,569 (27.54) | 5,343 (29.67) | 14,103  (29.45) | 4,082  (27.52) | 8,372  (29.20) |  |
| 71-80 | 39,809 (9.08) | 10,434 (7.05) | 8,189  (10.53) | 7,910 (10.88) | 926  (8.93) | 1,575  (7.79) | 1,652  (9.17) | 4,731  (9.88) | 1,228  (8.28) | 3,164  (11.03) |  |
| ≥81 | 25,009 (5.70) | 5,964  (4.03) | 5,119  (6.58) | 5,316 (7.31) | 530  (5.11) | 970  (4.80) | 973  (5.40) | 3,090  (6.45) | 811  (5.47) | 2,236  (7.80) |  |
| Gender, (n, %) |  |  |  |  |  |  |  |  |  |  | <.0001 |
| Male | 402,256 (91.76) | 136,899 (92.54) | 71,437 (91.88) | 66,336 (91.22) | 9,451 (91.14) | 18,549 (91.73) | 16,216 (90.04) | 43,641  (91.13) | 13,544  (91.31) | 26,183  (91.32) |  |
| Index Year, (n, %) |  |  |  |  |  |  |  |  |  |  | <.0001 |
| 2009 | 26,698 (6.09) | 4,314 (5.93) | 803  (7.74) | 1,178  (6.54) | 1,344  (6.65) | 1,388  (4.84) | 2,612  (5.45) | 749  (5.05) | 5,145  (6.62) | 9,165  (6.20) |  |
| 2010 | 101,609 (23.18) | 16,286  (22.40) | 3,035  (29.27) | 4,382  (24.33) | 5,212  (25.77) | 5,640  (19.67) | 9,976  (20.83) | 3,374  (22.75) | 19,032  (24.48) | 34,672  (23.44) |  |
| 2011 | 89,942 (20.52) | 14,302  (19.67) | 2,482  (23.93) | 4,058  (22.53) | 4,686  (23.17) | 5,682  (19.82) | 9,708  (20.27) | 3,247  (21.89) | 16,372  (21.06) | 29,405  (19.88) |  |
| 2012 | 79,829 (18.21) | 13,188  (18.14) | 2,143  (20.67) | 3,659  (20.32) | 4,584  (22.67) | 5,250  (18.31) | 9,191  (19.19) | 3,149  (21.23) | 14,024  (18.04) | 24,641  (16.66) |  |
| 2013 | 68,909 (15.72) | 11,665  (16.04) | 1,567  (15.11) | 3,045  (16.91) | 4,177  (20.66) | 5,197  (18.13) | 9,495  (19.83) | 3,702  (24.96) | 11,147  (14.34) | 18,914  (12.79) |  |
| 2014 | 61,460 (14.02) | 10,800  (14.85) | 340  (3.28) | 1,688  (9.37) | 219  (1.08) | 5,516  (19.24) | 6,905  (14.42) | 612  (4.13) | 10,259  (13.19) | 25,121  (16.98) |  |
| 2015 | 9,951 (2.27) | 2,165  (2.98) | 0  (0.00) | 0  (0.00) | 0  (0.00) | 0  (0.00) | 0  (0.00) | 0  (0.00) | 1,774  (2.28) | 6,012  (4.06) |  |
| Marital Status, (n, %) |  |  |  |  |  |  |  |  |  |  | <.0001 |
| Married | 223,361 (50.95) | 72,783 (49.20) | 41,724 (53.66) | 39,189 (53.89) | 5,161 (49.77) | 9,602 (47.48) | 8,998 (49.96) | 23,984  (50.08) | 7,088  (47.79) | 14,832  (51.73) |  |
| Divorced | 121,023 (27.61) | 43,542 (29.43) | 20,324 (26.14) | 18,481 (25.41) | 2,944 (28.39) | 5,888 (29.12) | 4,978 (27.64) | 13,104  (27.36) | 4,360  (29.39) | 7,402  (25.82) |  |
| Other | 94,014 (21.45) | 31,605 (21.37) | 15,705 (20.20) | 15,050 (20.70) | 2,265 (21.84) | 4,732 (23.40) | 4,034 (22.40) | 10,799  (22.55) | 3,385  (22.82) | 6,439  (22.46) |  |
| Rural-Urban Commuting Area, (n, %) |  |  |  |  |  |  |  |  |  |  | <.0001 |
| Urban | 303,997 (69.34) | 101,918 (68.90) | 53,092 (68.28) | 50,604 (69.59) | 7,195 (69.38) | 14,066 (69.56) | 12,946 (71.88) | 33,974  (70.95) | 10,261  (69.18) | 19,941  (69.55) |  |
| Large Rural | 62,162 (14.18) | 22,025 (14.89) | 11,321 (14.56) | 9,765 (13.43) | 1,444 (13.92) | 2,845 (14.07) | 2,316 (12.86) | 6,259  (13.07) | 2,196  (14.80) | 3,991  (13.92) |  |
| Isolated Small Rural | 63,112 (14.40) | 22,164 (14.98) | 11,698 (15.05) | 10,223 (14.06) | 1,426 (13.75) | 2,868 (14.18) | 2,244 (12.46) | 6,410  (13.39) | 2,073  (13.98) | 4,006  (13.97) |  |
| Missing | 9,127 (2.08) | 1,823  (1.23) | 1,642  (2.11) | 2,128 (2.93) | 305  (2.94) | 443  (2.19) | 504  (2.80) | 1,244  (2.60) | 303  (2.04) | 735  (2.56) |  |
| Enhanced Charlson Comorbidity Index (eCCI), (mean, SD) |  |  |  |  |  |  |  |  |  |  |  |
|  | 2.17  (1.97) | 2.11  (1.95) | 2.24  (1.96) | 2.23  (2.00) | 2.15  (1.90) | 2.15  (1.91) | 2.20  (2.00) | 2.21  (2.01) | 2.13  (1.90) | 2.09  (2.00) | <.0001 |
| eCCI Categories, (n, %) |  |  |  |  |  |  |  |  |  |  | <.0001 |
| 0 | 73,293 (16.72) | 25,735 (17.40) | 11,898 (15.30) | 11,706 (16.10) | 1,757 (16.94) | 3,322 (16.43) | 3,118 (17.31) | 7,947  (16.60) | 2,398  (16.17) | 5,412  (18.87) |  |
| 1 | 122,073 (27.85) | 41,946 (28.36) | 21,185 (27.25) | 19,784 (27.21) | 2,842 (27.41) | 5,719 (28.28) | 4,931 (27.38) | 13,246  (27.66) | 4,277  (28.83) | 8,143  (28.40) |  |
| 2 | 98,425 (22.45) | 33,537 (22.67) | 17,699 (22.76) | 16,334 (22.46) | 2,328 (22.45) | 4,570 (22.60) | 3,902 (21.67) | 10,453  (21.83) | 3,415  (23.02) | 6,187  (21.58) |  |
| 3 | 61,538 (14.04) | 20,355 (13.76) | 11,282 (14.51) | 10,413 (14.32) | 1,467 (14.15) | 2,830 (13.99) | 2,467 (13.70) | 6,797  (14.19) | 2,081  (14.03) | 3,846  (13.41) |  |
| 4 | 35,357 (8.07) | 11,328 (7.66) | 6,712  (8.63) | 6,103 (8.39) | 864  (8.33) | 1,660  (8.21) | 1,461  (8.11) | 3,923  (8.19) | 1,145  (7.72) | 2,161  (7.54) |  |
| 5 | 19,873 (4.53) | 6,292  (4.25) | 3,833  (4.93) | 3,461 (4.76) | 459  (4.43) | 918  (4.54) | 903  (5.01) | 2,185  (4.56) | 669  (4.51) | 1,153  (4.02) |  |
| ≥6 | 27,839 (6.35) | 8,737  (5.91) | 5,144  (6.62) | 4,919 (6.76) | 653  (6.30) | 1,203  (5.95) | 1,228  (6.82) | 3,336  (6.97) | 848  (5.72) | 1,771  (6.18) |  |
| Pain Condition, (n, %) |  |  |  |  |  |  |  |  |  |  | <.0001 |
| Back and/or Neck Pain Only | 95,791 (21.85) | 37,399 (25.28) | 15,855  (20.39) | 14,066 (19.34) | 2,174 (20.96) | 4,550 (22.50) | 3,335 (18.52) | 9,310  (19.44) | 3,302  (22.26) | 5,800  (20.23) |  |
| Arthritis Only | 116,559 (26.59) | 36,249 (24.50) | 20,951 (26.95) | 19,930 (27.41) | 2,796 (26.96) | 5,347 (26.44) | 4,918 (27.31) | 13,658  (28.52) | 4,080  (27.51) | 8,630  (30.10) |  |
| Headaches Only | 5,630 (1.28) | 1,913  (1.29) | 885  (1.14) | 861  (1.18) | 136  (1.31) | 286  (1.41) | 242  (1.34) | 691  (1.44) | 198  (1.33) | 418  (1.46) |  |
| Neuropathic Pain Only | 10,188 (2.32) | 3,621  (2.45) | 1,843  (2.37) | 1,634 (2.25) | 226  (2.18) | 453  (2.24) | 385  (2.14) | 994  (2.08) | 331  (2.23) | 701  (2.44) |  |
| Arthritis and Back and/or Neck Pain Only | 107,294 (24.47) | 35,632 (24.09) | 19,428  (24.99) | 18,375 (25.27) | 2,579 (24.87) | 4,889 (24.18) | 4,541 (25.21) | 11,697  (24.43) | 3,411  (23.00) | 6,742  (23.51) |  |
| Arthritis, Back and/or Neck Pain, and Headaches Only | 16,597 (3.79) | 5,212  (3.52) | 2,895  (3.72) | 2,912 (4.00) | 412  (3.97) | 789  (3.90) | 807  (4.48) | 1,933  (4.04) | 599  (4.04) | 1,038  (3.62) |  |
| Neuropathic Pain and One or More Others | 65,111 (14.85) | 20,905 (14.13) | 12,272 (15.78) | 11,387 (15.66) | 1,552 (14.97) | 2,898  (14.33) | 2,802  (15.56) | 7,183  (15.00) | 2,171  (14.64) | 3,941  (13.74) |  |
| All Tracer Pain Conditions | 2,326 (0.53) | 744  (0.50) | 437  (0.56) | 457  (0.63) | 54  (0.52) | 96  (0.47) | 113  (0.63) | 250  (0.52) | 56  (0.38) | 119  (0.42) |  |
| Other Multiple Pain Conditions | 18,902  (4.31) | 6,255  (4.23) | 3,187  (4.10) | 3,098  (4.26) | 441  (4.25) | 914  (4.52) | 867  (4.81) | 2,171  (4.53) | 685  (4.62) | 1,284  (4.48) |  |
| Other Medication Use, (n, %) |  |  |  |  |  |  |  |  |  |  |  |
| Antidepressant Use | 210,800 (48.08) | 72,717  (49.16) | 36,548  (47.01) | 33,534 (46.11) | 5,067  (48.86) | 10,683  (52.83) | 8,657  (48.07) | 23,351  (48.76) | 7,647  (51.55) | 12,596  (43.93) | <.0001 |
| Benzodiazepine Use | 93,352 (21.29) | 34,046  (23.01) | 15,651  (20.13) | 13,719 (18.87) | 2,298  (22.16) | 5,015  (24.80) | 3,761  (20.88) | 10,095  (21.08) | 3,517  (23.71) | 5,250  (18.31) | <.0001 |
| Hypnotics and Non-Benzodiazepine Sedative Use | 58,607  (13.37) | 20,809  (14.07) | 9,978  (12.83) | 8,820  (12.13) | 1,489  (14.36) | 3,153  (15.59) | 2,392  (13.28) | 6,378  (13.32) | 2,218  (14.95) | 3,370  (11.75) | <.0001 |
| Skeletal Muscle Relaxant Use | 149,246  (34.04) | 52,180  (35.27) | 25,720  (33.08) | 2,426  (33.37) | 3,697  (35.65) | 7,124  (35.23) | 6,414  (35.61) | 16,064  (33.55) | 4,992  (33.65) | 8,789  (30.65) | <.0001 |
| Other Non-Opioid Analgesic Use | 297,689  (67.90) | 97,615  (65.99) | 52,744  (67.84) | 49,944  (68.68) | 7,317  (70.56) | 13,917  (68.82) | 13,061 (72.52) | 33,642  (70.25) | 10,088  (68.01) | 19,361  (67.52) | <.0001 |
| Mental Health Conditions, (n, %) |  |  |  |  |  |  |  |  |  |  | <.0001 |
| No Mental Health Conditions | 169,209 (38.60) | 52,499 (35.49) | 32,448 (41.73) | 31,208 (42.92) | 3,936 (37.96) | 6,827 (33.76) | 6,995 (38.84) | 18,262  (38.14) | 5,061  (34.12) | 11,973  (41.76) |  |
| Alcohol Use Disorder | 4,848 (1.11) | 1,717  (1.16) | 833  (1.07) | 750  (1.03) | 117  (1.13) | 243  (1.20) | 175  (0.97) | 525  (1.10) | 165  (1.11) | 323  (1.13) |  |
| Anxiety Disorders | 13,643 (3.11) | 4,875  (3.30) | 2,374  (3.05) | 2,165 (2.98) | 270  (2.60) | 600  (2.97) | 523  (2.90) | 1,495  (3.12) | 470  (3.17) | 871  (3.04) |  |
| Bipolar Disorder | 2,043 (0.47) | 676  (0.46) | 356  (0.46) | 303  (0.42) | 50  (0.48) | 118  (0.58) | 86  (0.48) | 235  (0.49) | 69  (0.47) | 150  (0.52) |  |
| Major Depressive Disorder | 31,969  (7.29) | 10,451  (7.06) | 5,973  (7.68) | 5,501 (7.56) | 736  (7.10) | 1,524  (7.54) | 1,363  (7.57) | 3,444  (7.19) | 1,065  (7.18) | 1,912  (6.67) |  |
| Non-Opioid Use Disorder | 2,498  (0.57) | 939  (0.63) | 377  (0.48) | 354  (0.49) | 62  (0.60) | 125  (0.62) | 112  (0.62) | 268  (0.56) | 94  (0.63) | 167  (0.58) |  |
| Opioid Use Disorder | 301  (0.07) | 147  (0.10) | 30  (0.04) | 30  (0.04) | 7  (0.07) | 16  (0.08) | 10  (0.06) | 36  (0.08) | 11  (0.07) | 14  (0.05) |  |
| Post-Traumatic Stress Disorder | 16,285 (3.71) | 4,819  (3.26) | 3,053  (3.93) | 3,025 (4.16) | 388  (3.74) | 723  (3.58) | 776  (4.31) | 1,910  (3.99) | 537  (3.62) | 1,054  (3.68) |  |
| Schizophrenia | 1,370  (0.31) | 392  (0.26) | 246  (0.32) | 214  (0.29) | 41  (0.40) | 86  (0.43) | 58  (0.32) | 182  (0.38) | 52  (0.35) | 99  (0.35) |  |
| Tobacco Use Disorder | 41,365 (9.44) | 16,513  (11.16) | 7,035  (9.05) | 6,130 (8.43) | 948  (9.14) | 1,743  (8.62) | 1,485  (8.25) | 3,850  (8.04) | 1,297  (8.74) | 2,364  (8.24) |  |
| Multiple Mental Health Conditions | 154,867  (35.33) | 54,902  (37.11) | 25,028  (32.19) | 23,040 (31.68) | 3,815 (36.79) | 8,217 (40.63) | 6,427 (35.69) | 17,680  (36.92) | 6,012  (40.53) | 9,746  (33.99) |  |
| Number of the Following Visit Types, (mean, SD) |  |  |  |  |  |  |  |  |  |  |  |
| Physical Therapy | 4.82  (8.43) | 4.44  (8.33) | 4.73  (8.25) | 4.85  (7.91) | 4.87  (7.99) | 4.66  (8.67) | 5.55  (8.94) | 5.29  (8.71) | 4.81  (8.59) | 5.52  (9.34) | <.0001 |
| Pain Clinic | 3.50  (4.31) | 3.48  (4.16) | 3.59  (4.66) | 3.63  (4.64) | 3.31  (3.26) | 3.54  (3.89) | 3.46  (4.02) | 3.41  (3.79) | 3.41  (4.03) | 3.30  (5.32) | 0.0105 |
| Chiropractic Care | 4.19  (4.67) | 4.10  (4.86) | 4.34  (4.77) | 4.45  (4.85) | 3.61  (3.48) | 4.24  (4.14) | 4.22  (4.50) | 4.25  (4.79) | 3.81  (4.86) | 3.84  (3.30) | 0.1760 |
| Medicine and Primary Care | 10.54 (9.97) | 10.81  (9.86) | 10.22  (9.80) | 10.16 (9.74) | 10.02  (9.14) | 10.64  (10.02) | 10.86  (11.43) | 10.95  (10.40) | 10.66  (9.80) | 10.07  (10.11) | <.0001 |
| Emergency Department Care | 2.78  (3.04) | 2.67  (2.76) | 2.68  (2.88) | 2.80  (3.15) | 3.01  (3.55) | 2.86  (3.17) | 3.11  (3.65) | 2.97  (3.36) | 2.85  (3.26) | 2.67  (2.91) | <.0001 |
| Mental Health Care | 14.33 (27.47) | 13.56  (25.86) | 13.77  (26.65) | 13.91 (27.24) | 15.25  (27.78) | 15.75  (29.27) | 15.84  (29.77) | 15.94  (30.51) | 15.37  (28.68) | 14.94  (28.57) | <.0001 |
| Pain Score Characteristics (180 Days Prior to Index Date), (mean, SD) |  |  |  |  |  |  |  |  |  |  |  |
| First Pain Score | 4.08  (3.34) | 4.35  (3.31) | 3.98  (3.31) | 3.87  (3.32) | 4.07  (3.39) | 4.22  (3.37) | 3.97  (3.37) | 3.94  (3.37) | 4.17  (3.35) | 3.74  (3.34) | <.0001 |
| Last Pain Score | 4.12  (3.31) | 4.39  (3.28) | 3.94  (3.28) | 3.86  (3.30) | 4.03  (3.35) | 4.26  (3.34) | 4.03  (3.32) | 4.05  (3.33) | 4.26  (3.31) | 3.92  (3.31) | <.0001 |
| Change in Pain Score | 0.04  (3.27) | 0.04  (3.19) | 0.04  (3.25) | 0.01  (3.30) | 0.04  (3.38) | 0.04  (3.30) | 0.06  (3.45) | 0.10  (3.41) | 0.08  (3.24) | 0.18  (3.32) | <.0001 |
| Pain Score Average | 4.06  (2.74) | 4.33  (2.75) | 3.91  (2.71) | 3.83  (2.71) | 4.01  (2.74) | 4.20  (2.76) | 3.95  (2.68) | 3.95  (2.71) | 4.17  (2.75) | 3.80  (2.74) | <.0001 |
| Pain Score Median | 4.03  (3.02) | 4.32  (3.01) | 3.87  (3.00) | 3.78  (3.01) | 3.99  (3.06) | 4.18  (3.05) | 3.92  (3.00) | 3.91  (3.03) | 4.13  (3.04) | 3.73  (3.02) | <.0001 |
| Number of Pain Scores | 9.55 (47.44) | 9.52  (50.48) | 8.86  (44.72) | 8.82 (42.49) | 9.51  (43.27) | 10.65  (52.85) | 10.61  (46.59) | 10.52  (46.45) | 10.14  (48.58) | 10.20  (50.12) | <.0001 |
| Pain Score Characteristics (180 Days After the Index Date), (mean, SD) |  |  |  |  |  |  |  |  |  |  |  |
| First Pain Score | 4.71  (3.30) | 4.96  (3.23) | 4.46  (3.30) | 4.43  (3.34) | 4.71  (3.34) | 4.93  (3.27) | 4.72  (3.33) | 4.71  (3.34) | 4.86  (3.30) | 4.54  (3.36) | <.0001 |
| Last Pain Score | 3.98  (3.26) | 4.30  (3.22) | 3.84  (3.24) | 3.73  (3.26) | 3.93  (3.30) | 4.25  (3.29) | 3.76  (3.27) | 3.81  (3.27) | 4.12  (3.29) | 3.45  (3.24) | <.0001 |
| Change in Pain Score | 0.73  (3.44) | 0.66  (3.38) | 0.62  (3.37) | 0.70  (3.43) | 0.78  (3.53) | 0.68  (3.44) | 0.96  (3.58) | 0.90  (3.57) | 0.73  (3.48) | 1.09  (3.55) | <.0001 |
| Pain Score Average | 4.25  (2.58) | 4.53  (2.54) | 4.07  (2.61) | 4.00  (2.61) | 4.22  (2.59) | 4.48  (2.58) | 4.15  (2.52) | 4.16  (2.55) | 4.37  (2.60) | 3.94  (2.59) | <.0001 |
| Pain Score Median | 4.27  (2.93) | 4.59  (2.88) | 4.07  (2.94) | 4.00  (2.96) | 4.22  (2.97) | 4.54  (2.93) | 4.15  (2.91) | 4.17  (2.93) | 4.40  (2.96) | 3.91  (2.95) | <.0001 |
| Number of Pain Scores | 9.77  (31.54) | 8.89  (28.87) | 8.73  (28.60) | 9.55 (31.45) | 10.83  (33.19) | 9.54  (30.79) | 12.02  (35.56) | 12.35  (38.05) | 9.36  (28.52) | 11.85  (38.03) | <.0001 |
| Opioid Duration of Action (180 Days Prior to Index Date), (n, %) |  |  |  |  |  |  |  |  |  |  | <.0001 |
| No Opioid Use | 242,197 (55.25) | 94,166  (63.66) | 34,635  (44.54) | 30,775 (42.32) | 5,311 (51.22) | 12,015 (59.42) | 9,640 (53.53) | 27,095  (56.58) | 9,120  (61.48) | 19,440  (67.80) |  |
| Long-Acting Only | 1,684 (0.38) | 685  (0.46) | 334  (0.43) | 236  (0.32) | 37  (0.36) | 73  (0.36) | 52  (0.29) | 134  (0.28) | 62  (0.42) | 71  (0.25) |  |
| Short-Acting Only | 192,022 (43.80) | 52,189  (35.28) | 42,282  (54.38) | 41,294 (56.78) | 4,968 (47.91) | 8,018  (39.65) | 8,228  (45.69) | 20,420  (42.64) | 5,560  (37.48) | 9,063  (31.61) |  |
| Combination of Long and Short-Acting | 2,495 (0.57) | 890  (0.60) | 502  (0.65) | 415  (0.57) | 54  (0.52) | 116  (0.57) | 90  (0.50) | 238  (0.50) | 91  (0.61) | 99  (0.35) |  |
| Opioid Duration of Action (180 Days After Index Date), (n, %) |  |  |  |  |  |  |  |  |  |  | <.0001 |
| Long-Acting Only | 5,478 (1.25) | 3,107  (2.10) | 619  (0.80) | 404  (0.56) | 75  (0.72) | 281  (1.39) | 100  (0.56) | 400  (0.84) | 226  (1.52) | 266  (0.93) |  |
| Short-Acting Only | 406,837  (92.80) | 131,010  (88.56) | 74,348  (95.62) | 70,038 (96.31) | 9,861  (95.09) | 18,504  (91.50) | 17,189  (95.44) | 45,174  (94.33) | 13,607  (91.73) | 27,106  (94.53) |  |
| Combination of Long and Short-Acting | 26,083 (5.95) | 13,813  (9.34) | 2,786  (3.58) | 2,278 (3.13) | 434  (4.19) | 1,437  (7.11) | 721  (4.00) | 2,313  (4.83) | 1,000  (6.74) | 1,301  (4.54) |  |
| Schedule of Opioid Use (180 Days Prior to Index Date), (n, %) |  |  |  |  |  |  |  |  |  |  | <.0001 |
| No Opioid Therapy | 242,197 (55.25) | 94,166  (63.66) | 34,635  (44.54) | 30,775 (42.32) | 5,311  (51.22) | 12,015  (59.42) | 9,640  (53.53) | 27,095  (56.58) | 9,120  (61.48) | 19,440  (67.80) |  |
| Schedule II Only | 101,574 (23.17) | 31,626  (21.38) | 22,016  (28.32) | 19,524 (26.85) | 2,469  (23.81) | 4,475  (22.13) | 4,007  (22.25) | 9,935  (20.75) | 3,097  (20.88) | 4,425  (15.43) |  |
| Schedule III Only | 11,557 (2.64) | 2,501  (1.69) | 2,471  (3.18) | 2,839 (3.90) | 308  (2.97) | 470  (2.32) | 642  (3.56) | 1,365  (2.85) | 333  (2.24) | 628  (2.19) |  |
| Schedule IV Only | 66,533 (15.18) | 14,750  (9.97) | 15,255  (19.62) | 16,272 (22.38) | 1,808  (17.43) | 2,517  (12.45) | 2,888  (16.04) | 7,680  (16.04) | 1,838  (12.39) | 3,525  (12.29) |  |
| Schedule V Only | 2  (0.00) | 0  (0.00) | 1  (0.00) | 1  (0.00) | 0  (0.00) | 0  (0.00) | 0  (0.00) | 0  (0.00) | 0  (0.00) | 0  (0.00) |  |
| Use of Multiple Schedules | 16,535 (3.77) | 4,887  (3.30) | 3,375  (4.34) | 3,309  (4.55) | 474  (4.57) | 745  (3.68) | 833  (4.63) | 1,812  (3.78) | 445  (3.00) | 655  (2.28) |  |
| Schedule of Opioid Use (180 Days After Index Date), (n, %) |  |  |  |  |  |  |  |  |  |  | <.0001 |
| Schedule II Only | 212,447 (48.46) | 88,146  (59.59) | 35,340  (45.45) | 28,898 (39.74) | 4,448 (42.89) | 10,542 (52.13) | 7,202 (39.99) | 19,734  (41.21) | 7,401  (49.90) | 10,736  (37.44) |  |
| Schedule III Only | 15,538 (3.54) | 3,372  (2.28) | 3,212  (4.13) | 3,415 (4.70) | 451  (4.35) | 604  (2.99) | 826  (4.59) | 1,962  (4.10) | 500  (3.37) | 1,196  (4.17) |  |
| Schedule IV Only | 131,694 (30.04) | 30,881  (20.88) | 26,362  (33.90) | 27,227  (37.44) | 3,452  (33.29) | 5,365  (26.53) | 6,016 (33.40) | 16,059  (33.54) | 4,266  (28.76) | 12,066  (42.08) |  |
| Schedule V Only | 3  (0.00) | 0  (0) | 1  (0.00) | 0  (0) | 0  (0) | 0  (0) | 0  (0) | 2  (0.00) | 0  (0) | 0  (0) |  |
| Use of Multiple Schedules | 78,716 (17.96) | 25,531 (17.26) | 12,838 (16.51) | 13,180 (18.12) | 2,019 (19.47) | 3,711 (18.35) | 3,966 (22.02) | 10,130  (21.15) | 2,666  (17.97) | 4,675  (16.30) |  |
| Opioid Days’ Covered (180 Days Prior to Index Date), (mean, SD) |  |  |  |  |  |  |  |  |  |  |  |
|  | 44.28 (23.10) | 43.06 (23.89) | 48.63 (23.01) | 45.91 (21.98) | 43.83 (22.40) | 42.49  (23.47) | 39.89 (21.87) | 41.00  (22.48) | 41.83  (23.50) | 38.40  (21.98) | <.0001 |
| Opioid Days’ Covered (180 Days Prior to Index Date), (n, %) |  |  |  |  |  |  |  |  |  |  | <.0001 |
| 0 | 242,197 (55.25) | 94,166 (63.66) | 34,635  (44.54) | 30,775 (42.32) | 5,311 (51.22) | 12,015 (59.42) | 9,640 (53.53) | 27,095  (56.58) | 9,120  (61.48) | 19,440  (67.80) |  |
| 1-20 | 28,790 (6.57) | 9,556  (6.46) | 4,365 (5.61) | 4,532 (6.23) | 720  (6.94) | 1,483 (7.33) | 1,499 (8.32) | 3,674  (7.67) | 1,073  (7.23) | 1,888  (6.58) |  |
| 21-40 | 70,286 (16.03) | 18,808 (12.71) | 13,945 (17.93) | 15,261 (20.99) | 1,842 (17.76) | 2,916 (14.42) | 3,479 (19.32) | 8,129  (16.98) | 2,076  (14.00) | 3,830  (13.36) |  |
| 41-60 | 59,024 (13.46) | 14,943 (10.10) | 14,244 (18.32) | 14,026 (19.29) | 1,599 (15.42) | 2,271 (11.23) | 2,228 (12.37) | 5,821  (12.16) | 1,520  (10.25) | 2,372  (8.27) |  |
| >60 | 38,101 (8.69) | 10,457 (7.07) | 10,564 (13.59) | 8,126 (11.17) | 898  (8.66) | 1,537 (7.60) | 1,164 (6.46) | 3,168  (6.62) | 1,044  (7.04) | 1,143  (3.99) |  |
| Opioid Days’ Covered, (n, %) |  |  |  |  |  |  |  |  |  |  |  |
| Days 1 – 180 | 138.07 (28.12) | 158.38 (18.76) | 131.55 (22.21) | 120.68 (23.90) | 123.53 (25.98) | 153.96 (21.52) | 112.82 (22.91) | 130.22  (26.69) | 151.40  (22.84) | 111.16  (23.26) | <.0001 |
| Days 181 – 360 | 101.31 (59.99) | 160.58 (19.45) | 107.26 (30.46) | 76.96 (31.01) | 30.89 (28.92) | 153.05 (22.88) | 15.44 (18.76) | 42.81  (27.66) | 136.26  (25.25) | 0.08  (0.63) |  |
| Days 361 – 540 | 93.75 (64.97) | 163.85 (16.72) | 113.97 (29.63) | 63.91 (31.13) | 59.47 (35.11) | 125.03 (34.42) | 13.76 (17.90) | 10.57  (18.32) | 29.10  (26.65) | 0.00  (0.00) |  |
| Days 541 – 720 | 89.30 (67.55) | 161.48 (20.56) | 121.58 (28.35) | 49.42 (27.79) | 129.77 (26.64) | 33.19 (27.08) | 38.96 (24.64) | 0.89  (3.79) | 0.00  (0.00) | 0.00  (0.00) |  |
| Opioid Days’ Covered (Days 1 – 180), (n, %) |  |  |  |  |  |  |  |  |  |  | <.0001 |
| 90-110 | 85,964 (19.61) | 2,781  (1.88) | 12,377 (15.92) | 27,222 (37.43) | 3,641 (35.11) | 869  (4.38) | 9,466 (52.56) | 12,506  (26.12) | 842  (5.68) | 16,260  (56.71) |  |
| 111-130 | 93,184 (21.26) | 10,477 (7.08) | 28,606 (36.79) | 22,526 (30.98) | 2,940 (28.35) | 2,253 (11.14) | 4,886 (27.13) | 12,636  (26.39) | 2,065  (13.92) | 6,795  (23.70) |  |
| 131-150 | 91,620 (20.90) | 32,154 (21.74) | 20,318 (26.13) | 13,401 (18.43) | 1,909 (18.41) | 4,606 (22.78) | 2,118 (11.76) | 10,489  (21.90) | 3,423  (23.08) | 3,202  (11.17) |  |
| >150 | 167,630 (38.24) | 102,518 (69.30) | 16,452 (21.16) | 9,571 (13.16) | 1,880 (18.13) | 12,494 (61.78) | 1,540 (8.55) | 12,256  (25.59) | 8,503  (57.32) | 2,416  (8.43) |  |
| Average Morphine Equivalent Dose (180 Days Prior to the Index Date), (mean, SD) |  |  |  |  |  |  |  |  |  |  |  |
|  | 19.50 (14.26) | 21.16  (17.72) | 19.58  (13.15) | 18.36 (11.92) | 18.55 (10.93) | 19.93 (15.14) | 18.66 (13.19) | 18.29  (11.84) | 19.36  (13.54) | 18.35  (12.64) | <.0001 |
| Average Morphine Equivalent Dose (180 Days Prior to the Index Date), (n, %) |  |  |  |  |  |  |  |  |  |  | <.0001 |
| No Opioid Therapy | 242,197 (55.25) | 94,166 (63.66) | 34,635 (44.54) | 30,775 (42.32) | 5,311 (51.22) | 12,015 (59.42) | 9,640 (53.53) | 27,095  (56.58) | 9,120  (61.48) | 19,440  (67.80) |  |
| <=10 | 50,999 (11.63) | 12,048  (8.14) | 10,743  (13.82) | 12,012 (16.52) | 1,377 (13.28) | 2,147 (10.62) | 2,357 (13.09) | 6,093  (12.72) | 1,501  (10.12) | 2,721  (9.49) |  |
| >10-20 | 90,501 (20.64) | 23,751 (16.06) | 20,372 (26.20) | 19,928 (27.40) | 2,409 (23.23) | 3,648 (18.04) | 3,865 (21.46) | 9,623  (20.10) | 2,624  (17.69) | 4,281  (14.93) |  |
| >20 | 54,701 (12.48) | 17,965 (12.14) | 12,003 (15.44) | 10005 (13.76) | 1,273 (12.28) | 2,412 (11.93) | 2,148 (11.93) | 5,076  (10.60) | 1,588  (10.71) | 2,231  (7.78) |  |
| Average Morphine Equivalent Dose (180 Days After the Index Date), (mean, SD) |  |  |  |  |  |  |  |  |  |  |  |
|  | 21.46 (19.71) | 25.88 (26.30) | 19.56 (14.42) | 18.34 (12.15) | 19.25 (13.26) | 21.86 (20.09) | 18.39 (12.45) | 18.95  (14.70) | 21.44  (21.35) | 18.41  (15.18) | <.0001 |
| Average Morphine Equivalent Dose (180 Days After the Index Date), (n, %) |  |  |  |  |  |  |  |  |  |  | <.0001 |
| <=10 | 102,495 (23.38) | 26,336 (17.80) | 18,614  (23.94) | 19,636 (27.00) | 2,621 (25.27) | 4,777 (23.62) | 4,919 (27.31) | 13,103  (27.36) | 3,621  (24.41) | 8,868  (30.93) |  |
| >10-20 | 188,820 (43.07) | 56,191 (37.98) | 36,481 (46.92) | 34,301 (47.17) | 4,787 (46.16) | 8,299 (41.04) | 8,252 (45.82) | 21,552  (45.01) | 6,263  (42.22) | 12,694  (44.27) |  |
| >20 | 147,083 (33.55) | 65,403 (44.21) | 22,658 (29.14) | 18,783 (25.83) | 2,962 (28.56) | 7,146 (35.34) | 4,839 (26.87) | 13,232  (27.63) | 4,949  (33.36) | 7,111  (24.80) |  |

aχ2 and analysis of variance (ANOVA) tests were run on the demographics, χ2 tests were run for categorical variables and ANOVA tests were run for continuous variables.

| *eTable 4*  **Model Selection Using BIC and Predicted Group Proportions Using Group-Based Trajectory Models in Determining AMME*b* Trajectory Groups  (N = 438,398)** | | | | | | | | | | |
| --- | --- | --- | --- | --- | --- | --- | --- | --- | --- | --- |
| Predicted Group Proportions | | | | | | | | | | |
| *Number of Groups* | *BICa* | *Group1* | *Group2* | *Group3* | *Group4* | *Group5* | *Group6* | *Group7* | *Group8* | *Group9* |
| 2 | -2094300 | 18.66% | 81.34% |  |  |  |  |  |  |  |
| 3 | -1987547 | 14.21% | 9.20% | 76.59% |  |  |  |  |  |  |
| 4 | -1907864 | 13.71% | 8.33% | 9.42% | 68.55% |  |  |  |  |  |
| 5 | -1827022 | 6.96% | 55.82% | 6.63% | 16.52% | 14.07626 |  |  |  |  |
| 6 | -1805094 | 6.92% | 30.23% | 39.38% | 3.98% | 16.53828 | 2.95% |  |  |  |
| 7 | -1783405 | 7.02% | 6.55% | 42.78% | 23.91% | 1.40578 | 16.47% | 1.86% |  |  |
| 8 | -1618875 | 7.18% | 6.98% | 3.74% | 2.68% | 39.30% | 8.12% | 4.32% | 27.68% |  |

*a*BIC=Bayesian Information Criterion. Higher values indicate better model fit; *b*AMME=Average morphine milligram equivalent dose per day

| *eTable 5*  **Nagin’s Diagnostic Criteria for AMME Trajectories** | | | | | |
| --- | --- | --- | --- | --- | --- |
| *Group* | *Group Probability (95% Confidence Interval)a* | *Proportion Classified in Each Groupb* | *Average Posterior Probabilityc* | *Odds Correct Classificationd* | *|∆|e* |
| Delayed Discontinuation | 0.059 (0.058, 0.060) | 0.072 | 0.991 | 1792.86 | 0.013 |
| Rapid Discontinuation/Reduction | 0.064 (0.064, 0.065) | 0.070 | 0.996 | 3262.73 | 0.006 |
| Slow, Persistent Dose Reduction | 0.034 (0.033, 0.034) | 0.037 | 0.893 | 240.29 | 0.004 |
| Persistent, High Dose | 0.025 (0.025, 0.026) | 0.029 | 0.889 | 311.37 | 0.002 |
| Persistent Moderate Dose | 0.444 (0.442, 0.445) | 0.393 | 0.804 | 5.15 | 0.051 |
| Midpoint Discontinuation | 0.067 (0.066, 0.067) | 0.081 | 0.998 | 7594.98 | 0.015 |
| Dose Reduction Followed by Increase | 0.040 (0.040, 0.041) | 0.043 | 0.927 | 300.30 | 0.003 |
| Persistent, Moderately-High Dose | 0.267 (0.266, 0.269) | 0.277 | 0.829 | 13.30 | 0.009 |

*a*Actual proportion of individuals assigned to each trajectory group using the maximum probability rule.

*b*Proportion classified in each group is based on the maximum posterior probability rule.

*c*Average posterior probability is obtained by averaging the posterior probabilities for a given group for all individuals placed in this group by the maximum posterior probability rule. Average posterior probability is acceptable if equal to 0.7 or greater for each group.

*d*Odds Correct Classification values should be 5.0 or greater for each group.

*e*This value represents the difference between the group probability and the proportion classified in each group.


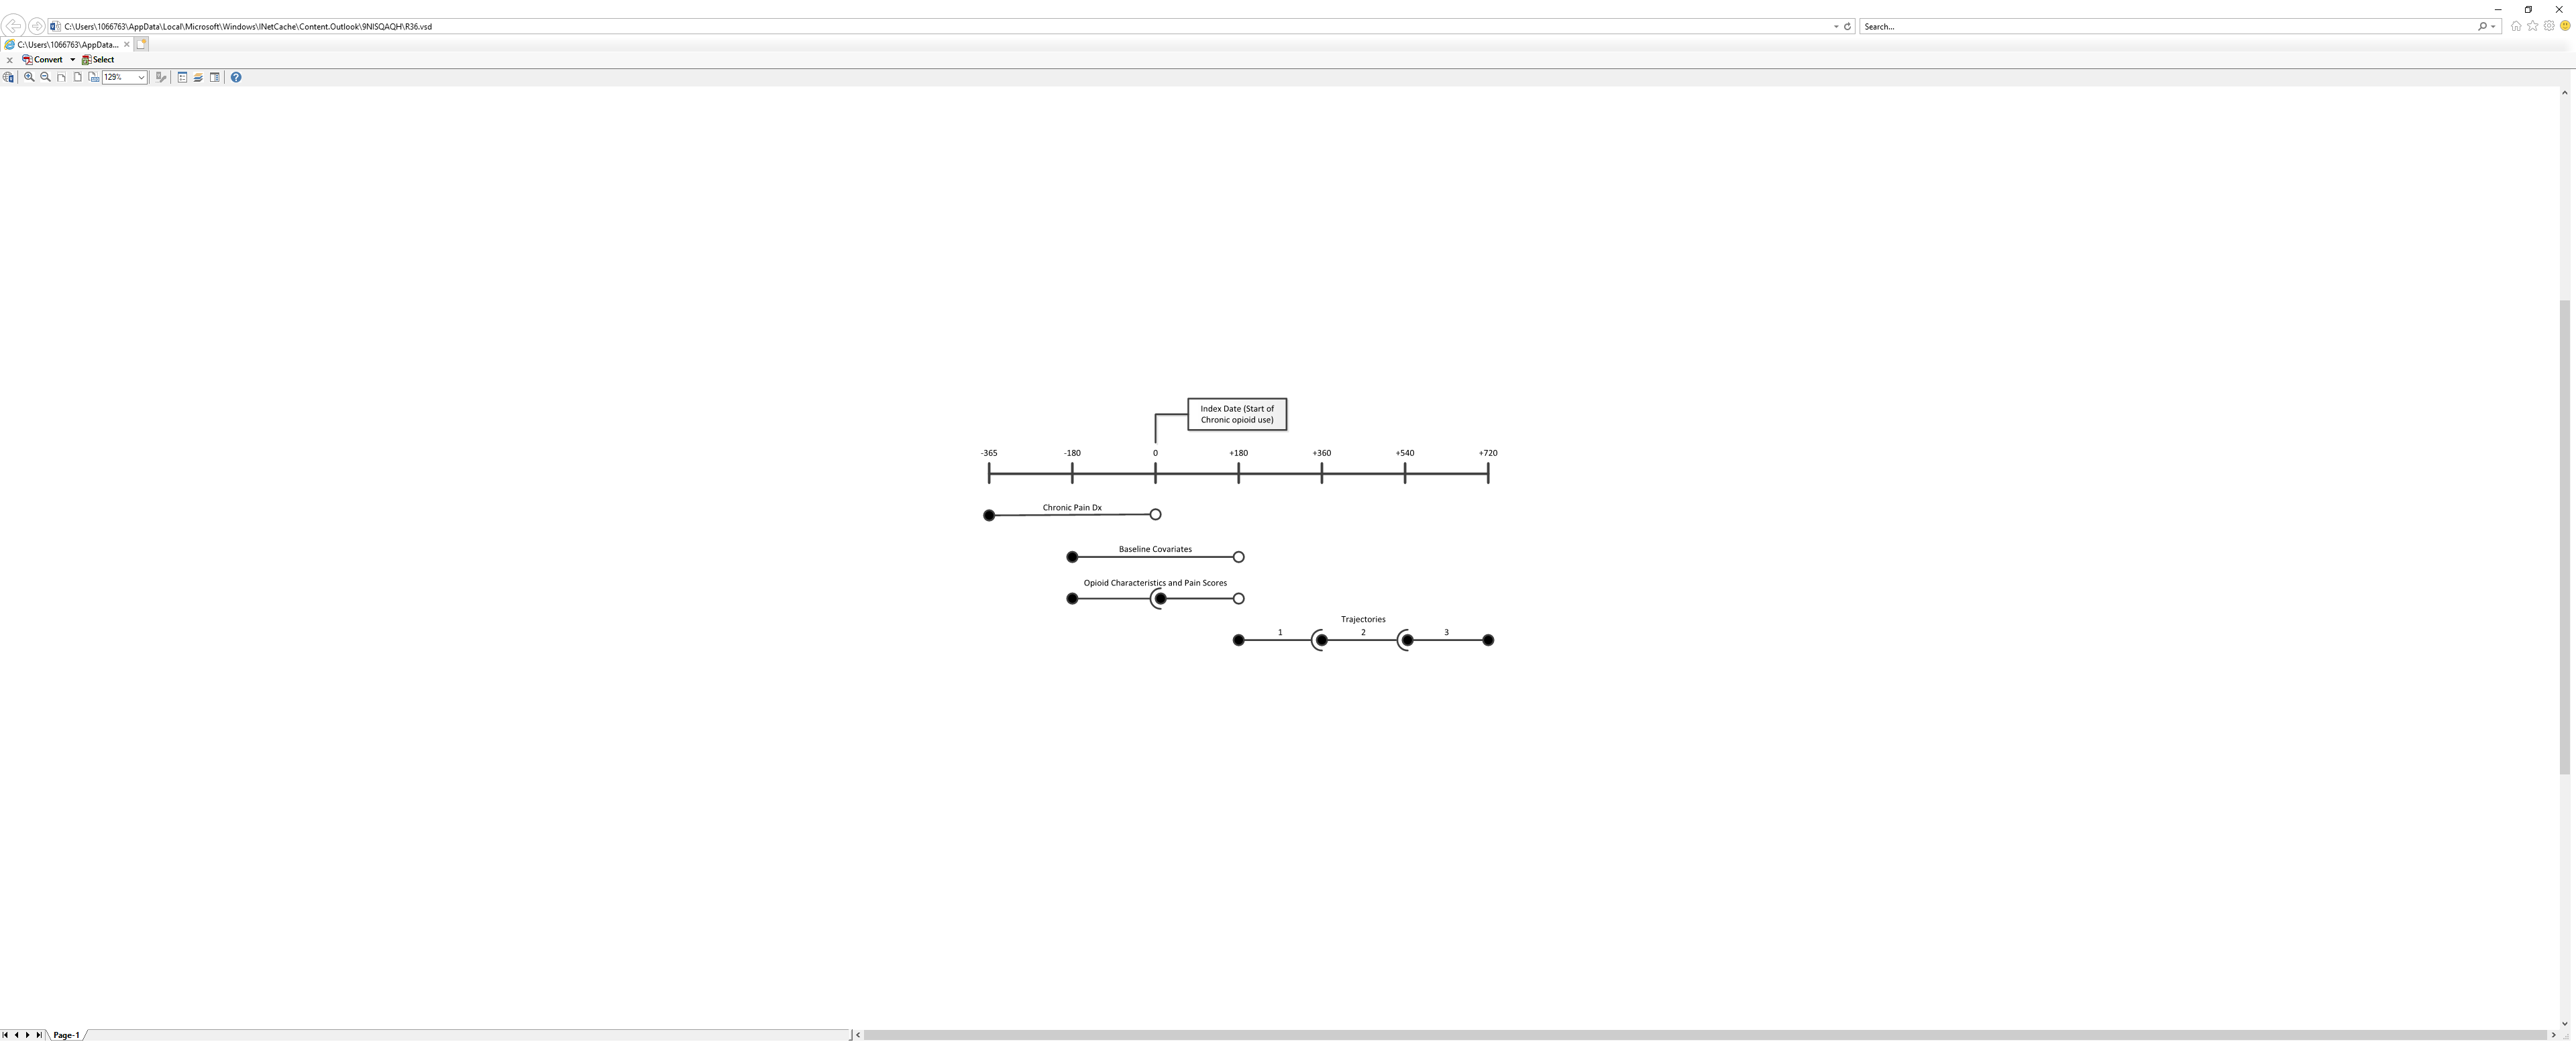


Enclosed black dot represents inclusion of the time point

Open dot represents exclusion of the time point

*eFigure 1. Study design.*


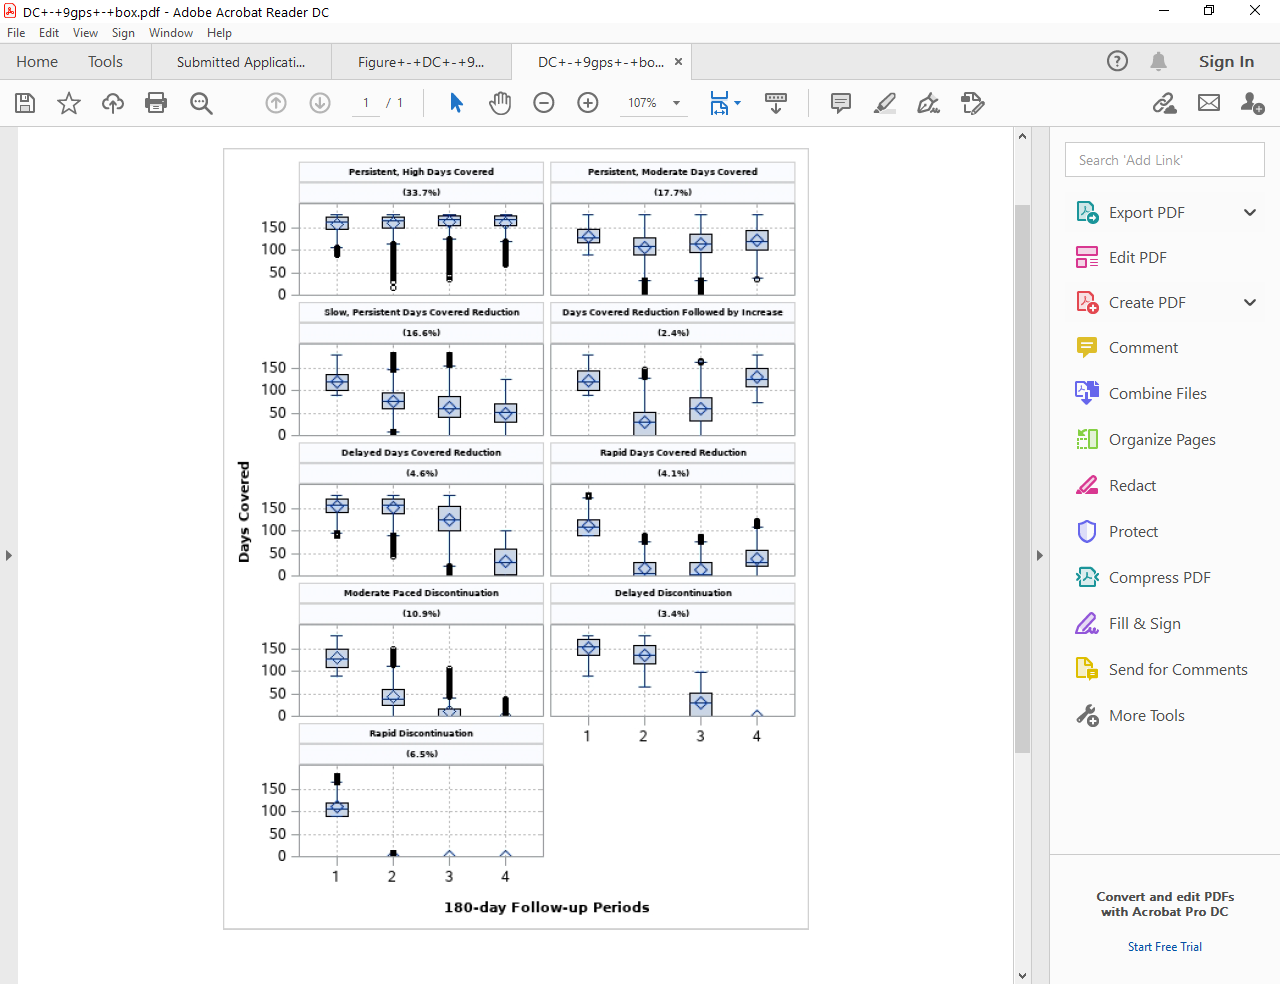


*eFigure. 2. Box plots for the nine days covered trajectories of patients initially on long-term opioid therapy.*


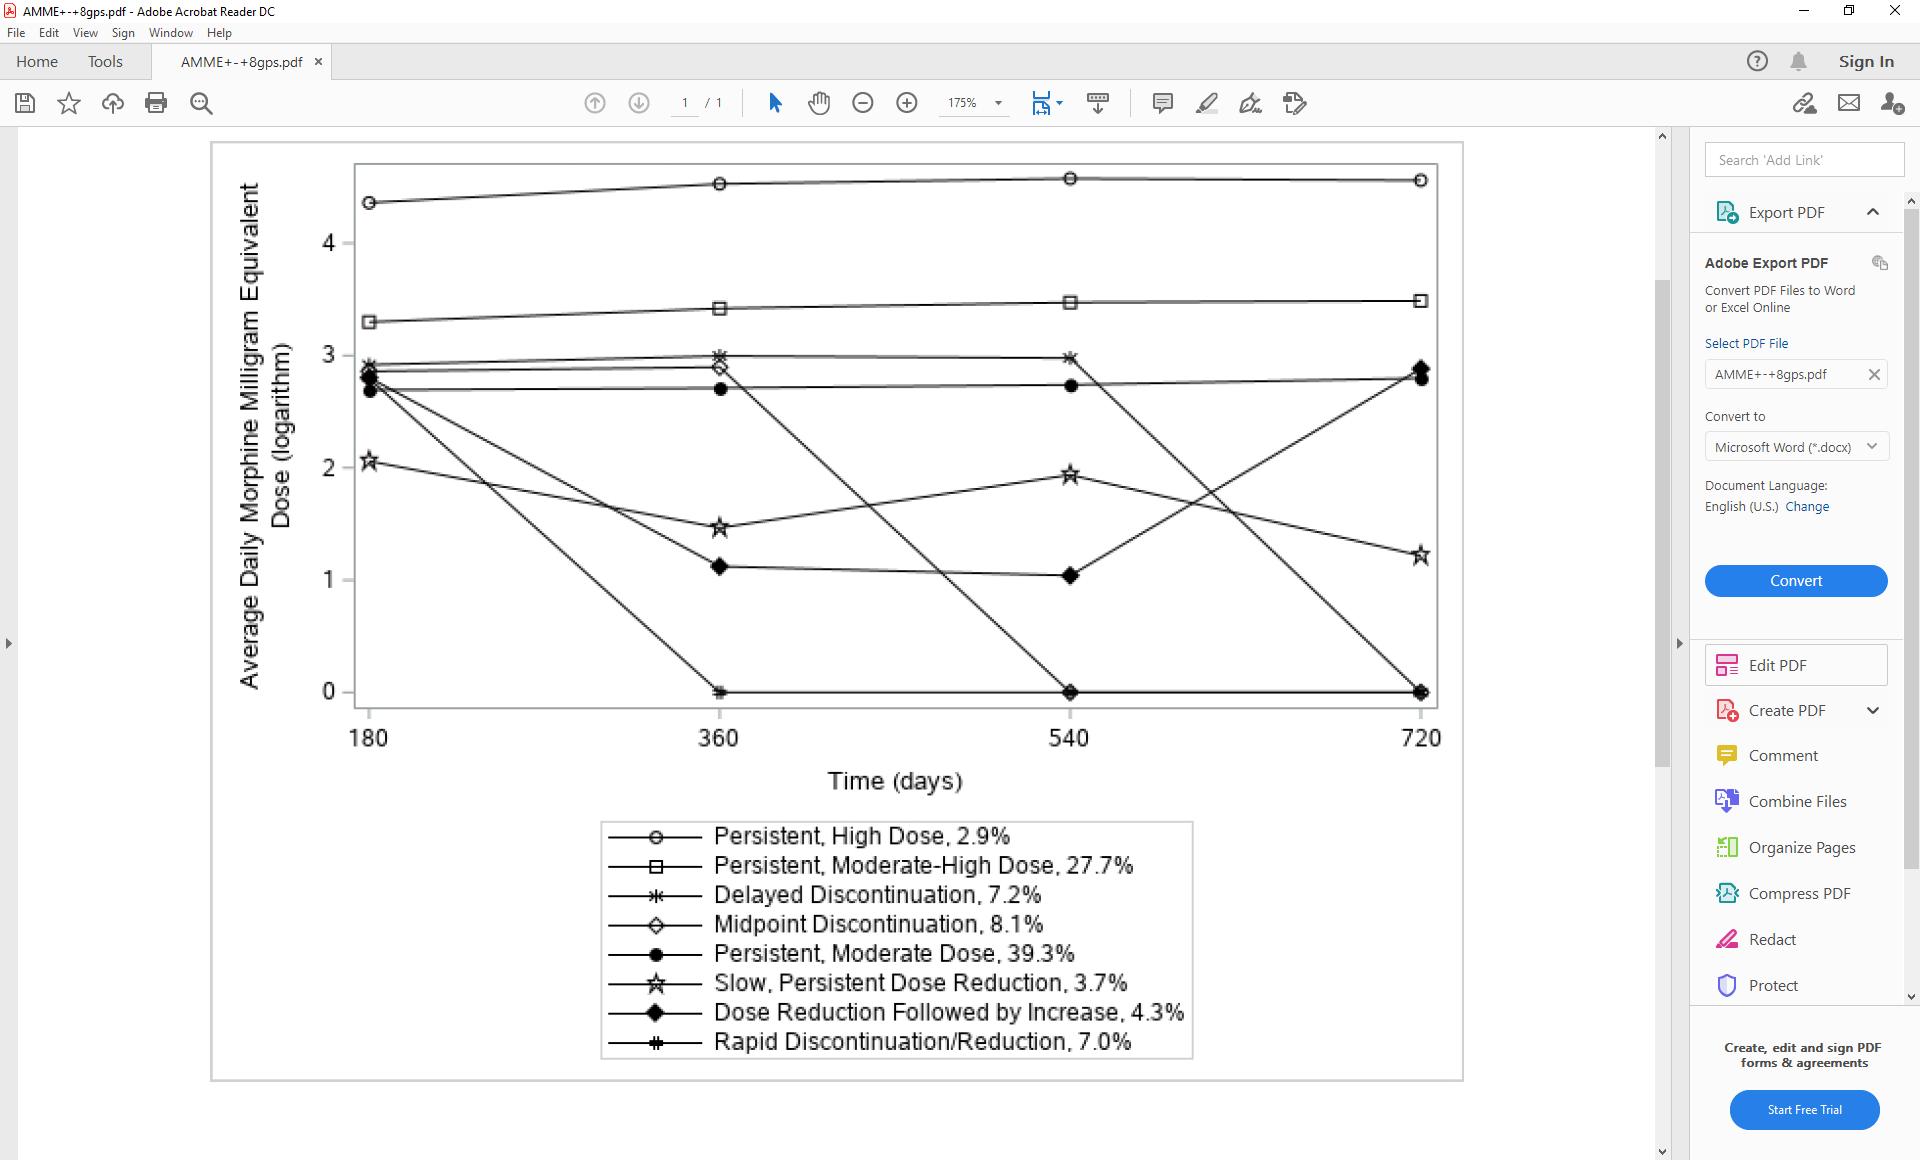


*eFigure. 3. Graphical depiction of the eight average daily morphine milligram equivalent trajectories of Veterans initiating long-term opioid therapy.*
